# Supplementary material for: QSPR and q-RASPR predictions of the adsorption capacity of polyethylene, polypropylene and polystyrene microplastics for various organic pollutants in diverse aqueous environments
Source: Royal Society of Chemistry journal article supplement (doi:10.1039/d4en00311j), 2024-01-01
Supplement: d4en00311j1.xlsx [file d4en00311j1.xlsx]

## Sheet: Sheet1
						Supplementary Materials 1
QSPR and q-RASPR predictions of the adsorption capacity of polyethylene, polypropylene and polystyrene microplastics for various organic pollutants in diverse aqueous environments
								Md Mobarak Hossain1, Arkaprava Banerjee1, Mainak Chatterjee1, Kunal Roy1, *, and Mark TD Cronin2
								1Department of Pharmaceutical Technology, Jadavpur University, Kolkata 700032, India
								2School of Pharmacy and Biomolecular Sciences, Liverpool John Moores University, Liverpool L3 3AF, UK
							*Corresponding author
							Prof. Kunal Roy, Phone: +91 9831594140; Fax: +91-33-2837-1078;
							Email: kunalroy_in@yahoo.com; kunal.roy@jadavpuruniversity.in

## Sheet: Dataset 1
Dataset 1	polyethylene in sea water
				descriptors		end points
compound no	organic compound name	C%	F05[C-Cl]	F08[Cl-Cl]	MLOGP2	logKD	set
PE-1-S	2,4,4′-trichlorobiphenyl	54.5455	4	0	29.9373	6.15	Test
PE-2-S	2,4′,5-trichlorobiphenyl	54.5455	5	1	29.9373	6	Train
PE-3-S	2,2′,3,5′-tetrachlorobiphenyl	54.5455	8	0	35.8668	5.89	Train
PE-4-S	2,2′,5,5′-tetrachlorobiphenyl	54.5455	8	0	35.8668	5.9	Train
PE-5-S	2,4,4′,5-tetrachlorobiphenyl	54.5455	6	1	35.8668	6.66	Train
PE-6-S	2,3′,4,4′-tetrachlorobiphenyl	54.5455	6	1	35.8668	6.69	Test
PE-7-S	2,2′,4,5,6′-pentachlorobiphenyl	54.5455	9	0	38.8393	6.19	Train
PE-8-S	2,3,3′,4,4′-pentachlorobiphenyl	54.5455	8	2	38.8393	6.97	Test
PE-9-S	2,3′,4,4′,5-pentachlorobiphenyl	54.5455	8	2	38.8393	7	Train
PE-10-S	3,3′,4,4′,5-pentachlorobiphenyl	54.5455	8	3	38.8393	7.78	Train
PE-11-S	3,3′,4,4′,5,5′-hexachlorobiphenyl	54.5455	10	4	41.8569	8.84	Train
PE-12-S	2,2′,3,4′,5,6-hexachlorobiphenyl	54.5455	11	2	41.8569	6.79	Test
PE-13-S	2,2′,3,4,4′,5′-hexachlorobiphenyl	54.5455	10	2	41.8569	7.25	Train
PE-14-S	2,2′,4,4′,5,5′-hexachlorobiphenyl	54.5455	10	2	41.8569	7.65	Train
PE-15-S	2,3,3′,4,4′,5-hexachlorobiphenyl	54.5455	10	3	41.8569	7.86	Train
PE-16-S	2,2′,3,3′,4,4′,5-heptachlorobiphenyl	54.5455	12	3	44.9173	7.94	Train
PE-17-S	2,2′,3,4,4′,5,5′-heptachlorobiphenyl	54.5455	12	3	44.9173	7.94	Test
PE-18-S	Dichlorodiphenyltrichloroethane	50	14	0	38.02	4.986	Train
PE-19-S	Pentachlorobenzene	50	0	0	24.2628	5.22	Train
PE-20-S	Hexachlorobenzene	50	0	0	27.1104	4.63	Train
PE-21-S	Phenanthrene	58.3333	0	0	18.7625	4.44	Train
PE-22-S	Fluoranthene	61.5385	0	0	22.6534	5.52	Train
PE-23-S	Anthracene	58.3333	0	0	18.7625	4.77	Test
PE-24-S	Pyrene	61.5385	0	0	22.6534	5.57	Test
PE-25-S	Chrysene	60	0	0	26.6745	6.39	Train
PE-26-S	Benzoapyrene	62.5	0	0	30.8095	7.17	Train
PE-27-S	Dibenzanthracene	61.1111	0	0	35.0455	7.87	Train
PE-28-S	Benzo[g,h,i]perylene	64.7059	0	0	35.0455	7.61	Train
PE-29-S	Pentadecafluorooctanoic acid	30.7692	0	0	17.3905	2.695	Train
PE-30-S	Dioctyl phthalate	36.3636	0	0	40.1754	4.993	Train
PE-31-S	Trimethoprim	35.8974	0	0	1.59064	0.811	Train
PE-32-S	Sulfadiazine	37.037	0	0	0.237284	0.797	Train
PE-33-S	Oxytetracycline	38.5965	0	0	2.55641	0.623	Train
PE-34-S	Hexachlorocyclohexane	33.3333	0	0	16.7441	2.215	Test

## Sheet: Dataset 2
Dataset 2	PE in pure water
						descriptors				end points
compound no	organic compound name			C-005	H-046	NsssCH	B05[C-Cl]	F03[N-O]	MLOGP2	logKD	set
PE-1-P	2,2′,5-trichlorobiphenyl			0	0	0	1	0	29.9373	4.9	Train
PE-2-P	2,4,4′-trichlorobiphenyl			0	0	0	1	0	29.9373	5.4	test
PE-3-P	2,4′,5-trichlorobiphenyl			0	0	0	1	0	29.9373	5.301	Train
PE-4-P	2,2′,4,4′-tetrachlorobiphenyl			0	0	0	1	0	35.8668	5.083	Train
PE-5-P	2,2′,5,5′-tetrachlorobiphenyl			0	0	0	1	0	35.8668	5.5	test
PE-6-P	2,2′,3,5-tetrachlorobiphenyl			0	0	0	1	0	35.8668	5.5	Train
PE-7-P	2,3′,4,4′-tetrachlorobiphenyl			0	0	0	1	0	35.8668	5.9	Train
PE-8-P	2,2′,4,5,5′-pentachlorobiphenyl			0	0	0	1	0	38.8393	6.2	Train
PE-9-P	2,3,3′,4′,6-pentachlorobiphenyl			0	0	0	1	0	38.8393	6.1	test
PE-10-P	2,3′,4,4′,5-pentachlorobiphenyl			0	0	0	1	0	38.8393	6.4	Train
PE-11-P	2,3,3′,4,4′-pentachlorobiphenyl			0	0	0	1	0	38.8393	6.3	Train
PE-12-P	2,2′,4,5′,6-pentachlorobiphenyl			0	0	0	1	0	38.8393	5.019	Train
PE-13-P	2,2′,4,4′,5,5′-hexachlorobiphenyl			0	0	0	1	0	41.8569	6.4	Train
PE-14-P	2,2′,3,4,4′,5′-hexachlorobiphenyl			0	0	0	1	0	41.8569	6.6	Train
PE-15-P	2,2′,3,3′,4,5-hexachlorobiphenyl			0	0	0	1	0	41.8569	6.6	test
PE-16-P	2,2′,3,3′,4,4′-hexachlorobiphenyl			0	0	0	1	0	41.8569	6.5	Train
PE-17-P	2,2′,3,4′,5,5′,6-heptachlorobiphenyl			0	0	0	1	0	44.9173	7.1	test
PE-18-P	2,2′,3,4,4′,5,5′-heptachlorobiphenyl			0	0	0	1	0	44.9173	7	Train
PE-19-P	2,2′,3,3′,4,4′,5-heptachlorobiphenyl			0	0	0	1	0	44.9173	6.9	Train
PE-20-P	Chlorobenzene			0	0	0	0	0	8.2722	3.08	test
PE-21-P	Benzene			0	0	0	0	0	5.08467	2.19	Train
PE-22-P	Toluene			0	3	0	0	0	6.80241	2.91	Train
PE-23-P	Ethyl benzoate			0	0	0	0	0	5.52589	2.81	Train
PE-24-P	Naphthalene			0	0	0	0	0	11.4649	3.77	Train
PE-25-P	2-Methylanthracene			0	3	0	0	0	21.047	5	Train
PE-26-P	1-methylphenanthrene			0	3	0	0	0	21.047	4.7	Train
PE-27-P	9,10-Dimethylanthracene			0	6	0	0	0	23.3975	5.3	test
PE-28-P	3,6-dimethylphenanthrene			0	6	0	0	0	23.3975	5.2	Train
PE-29-P	Phenanthrene			0	0	0	0	0	18.7625	4.3	Train
PE-30-P	Anthracene			0	0	0	0	0	18.7625	4.3	test
PE-31-P	Oxytetracycline			2	0	4	0	1	2.55641	1.176	Train
PE-32-P	Phenylalanine			0	0	1	0	2	0.937139	3.519	Train
PE-33-P	Cyclohexane			0	12	0	0	0	9.76009	3.88	Train
PE-34-P	Hexane			0	14	0	0	0	12.3631	4.5	Train
PE-35-P	Carbamazepine			0	0	0	0	0	6.70083	2.281	Train
PE-36-P	3-(4-methylbenzylidene)camphor			0	17	1	0	0	16.5747	4.726	Train
PE-37-P	Triclosan			0	0	0	1	0	14.7587	3.711	test
PE-38-P	Sulfamethoxazole			0	0	0	0	1	0.942176	2.845	test
PE-39-P	Propanolol			0	0	2	0	1	6.42033	3.362	Train
PE-40-P	Sertraline			1	3	2	1	0	26.5126	3.522	Train
PE-41-P	p,p’-DDT			0	0	1	1	0	38.02	5.59	Train
PE-42-P	o,p’-DDT			0	0	1	1	0	38.02	5.76	Train
PE-43-P	p,p’-DDD			0	0	2	1	0	35.2087	4.89	Train
PE-44-P	o,p’-DDD			0	0	2	1	0	35.2087	4.94	Train
PE-45-P	p,p’-DDE			0	0	0	1	0	34.2681	5.77	test
PE-46-P	o,p’-DDE			0	0	0	1	0	34.2681	5.62	Train
PE-47-P	p,p’-DDMU			0	0	0	1	0	31.5431	5.37	Train

## Sheet: Dataset 3
Dataset 3	PE in fresh water
		descriptors		end points
compound no	organic compound name	F07[C-Cl]	MLOGP	logKD	set
PE-1-F	2,4,4′-trichlorobiphenyl	4	5.4715	5.35	train
PE-2-F	2,4′,5-trichlorobiphenyl	3	5.4715	5.11	train
PE-3-F	2,2′,3,5′-tetrachlorobiphenyl	2	5.98889	4.92	train
PE-4-F	2,2′,5,5′-tetrachlorobiphenyl	2	5.98889	5.01	test
PE-5-F	2,4,4′,5-tetrachlorobiphenyl	5	5.98889	5.89	test
PE-6-F	2,3′,4,4′-tetrachlorobiphenyl	5	5.98889	6.17	train
PE-7-F	3,3′,4,4′-tetrachlorobiphenyl	6	5.98889	6.62	train
PE-8-F	2,2′,4,5,6′-pentachlorobiphenyl	3	6.23212	5.61	train
PE-9-F	2,3,3′,4,4′-pentachlorobiphenyl	6	6.23212	6.35	test
PE-10-F	2,3′,4,4′,5-pentachlorobiphenyl	6	6.23212	6.36	train
PE-11-F	3,3′,4,4′,5-pentachlorobiphenyl	7	6.23212	6.94	train
PE-12-F	3,3′,4,4′,5,5′-hexachlorobiphenyl	8	6.46969	8.78	train
PE-13-F	2,2′,3,4′,5,6-hexachlorobiphenyl	4	6.46969	6.18	train
PE-14-F	2,2′,3,4,4′,5′-hexachlorobiphenyl	6	6.46969	6.89	train
PE-15-F	2,2′,4,4′,5,5′-hexachlorobiphenyl	6	6.46969	7.04	train
PE-16-F	2,3,3′,4,4′,5-hexachlorobiphenyl	7	6.46969	7.17	train
PE-17-F	2,2′,3,4,4′,5-hexachlorobiphenyl	6	6.46969	6.92	test
PE-18-F	2,2′,3,4′,5′,6-hexachlorobiphenyl	4	6.46969	6.24	train
PE-19-F	2,2′,3,3′,4,4′,5-heptachlorobiphenyl	7	6.70203	7.29	test
PE-20-F	2,2′,3,4,4′,5,5′-heptachlorobiphenyl	7	6.70203	7.39	train
PE-21-F	Ciprofloxacin	0	1.67056	1.741	train
PE-22-F	Trimethoprim	0	1.26121	0.923	test
PE-23-F	Sulfadiazine	0	0.487118	0.792	train
PE-24-F	Amoxicillin	0	0.581406	0.924	train

## Sheet: Dataset 4
Dataset 4	polypropylene in sea water
			descriptors			end points
compound no	organic compound name	Mi	X1v	B05[C-Cl]	F06[Cl-Cl]	logKD	set
PP-1-S	2,3-dichlorobiphenyl	1.08927	5.03859	1	0	4.98	test
PP-2-S	2,4′-dichlorobiphenyl	1.08927	5.03261	1	0	4.98	train
PP-3-S	2,4,4′-trichlorobiohenyl	1.08673	5.51024	1	0	5.09	train
PP-4-S	2,2′,5,5′-tetrachlorobiphenyl	1.08418	5.99385	1	2	5.09	train
PP-5-S	2,2′,3,5′-tetrachlorobiphenyl	1.08418	5.99984	1	2	5.14	train
PP-6-S	3,3′,4,4′-tetrachlorobiphenyl	1.08418	5.99385	1	0	5.63	test
PP-7-S	2,3′,4,4-tetrachlorobiphenyl	1.08418	5.99984	1	0	5.26	train
PP-8-S	2,3′,4,4′,5-pentachlorobiphenyl	1.08164	6.47747	1	1	5.71	train
PP-9-S	2,3,3′,4,4′-pentachlorobiphenyl	1.08164	6.48345	1	1	5.77	train
PP-10-S	2,2′,3,4′,5-pentachlorobiphenyl	1.08164	6.47747	1	2	5.51	train
PP-11-S	2,2′,3,5′,6-pentachlorobiphenyl	1.08164	6.48345	1	3	5.26	test
PP-12-S	2,3,3′,4′,6-pentachlorobiphenyl	1.08164	6.48345	1	2	5.63	train
PP-13-S	2,2′,4,5,5′-pentachlorobiphenyl	1.08164	6.47747	1	2	5.51	train
PP-14-S	2,2′,3,3′,4,6′-hexachlorobiphenyl	1.07909	6.97305	1	3	6.19	train
PP-15-S	2,3,3′,4,5,6-hexachlorobiphenyl	1.07909	6.97305	1	2	6.06	train
PP-16-S	2,2′,4,4′,5,5′-hexachlorobiphenyl	1.07909	6.96108	1	2	6.19	train
PP-17-S	2,2′,3,4,4′,5-hexachlorobiphenyl	1.07909	6.96706	1	2	5.77	test
PP-18-S	2,2′,3,3′,4,4′-hexachlorobiphenyl	1.07909	6.97305	1	2	5.45	train
PP-19-S	2,2′,3,4′,5,5′,6-heptachlorobiphenyl	1.07655	7.45068	1	4	5.73	train
PP-20-S	Pentachlorobenzene	1.08047	4.41208	0	0	4.5	train
PP-21-S	Hexachlorobenzene	1.0758	4.90168	0	0	5.01	train
PP-22-S	Phenanthrene	1.0865	4.81538	0	0	4	train
PP-23-S	Fluoranthene	1.07985	5.56538	0	0	4.79	train
PP-24-S	Anthracene	1.0865	4.8094	0	0	4.29	train
PP-25-S	Pyrene	1.07985	5.5594	0	0	4.8	test
PP-26-S	Chrysene	1.08304	6.22607	0	0	5.51	train
PP-27-S	Benzoapyrene	1.07785	6.97008	0	0	6.1	train
PP-28-S	Dibenz[a,h]anthracene	1.08073	7.63077	0	0	7	test
PP-29-S	Benzo[g,h,i]perylene	1.07327	7.72008	0	0	6.69	test
PP-30-S	Trimethoprim	1.14174	6.24397	0	0	0.594	train
PP-31-S	Sulfadiazine	1.1325	6.21507	0	0	0.853	test
PP-32-S	Hexachlorocyclohexane	1.11973	5.92792	0	0	2.42	train

## Sheet: Dataset 5
Dataset 5	polystyrene in sea water
			descriptors		end points
compound no	organic compound name	C%	B10[C-O]	MLOGP	logKD	set
PS-1-S	Pentachlorobenzene	50	0	4.92573	5.1	train
PS-2-S	Hexachlorobenzene	50	0	5.20677	5.28	train
PS-3-S	Phenanthrene	58.3333	0	4.33157	5.39	train
PS-4-S	Fluoranthene	61.5385	0	4.75956	5.91	test
PS-5-S	Anthracene	58.3333	0	4.33157	5.61	train
PS-6-S	Pyrene	61.5385	0	4.75956	5.84	train
PS-7-S	Chrysene	60	0	5.16473	6.63	train
PS-8-S	Benzo[a]pyrene	62.5	0	5.55063	6.92	test
PS-9-S	Dibenz[a,h]anthracene	61.1111	0	5.91992	7.52	train
PS-10-S	Benzo[g,h,i]perylene	64.7059	0	5.91992	7.15	train
PS-11-S	4-Fluorobenzoic acid	46.6667	0	2.13698	2.134	train
PS-12-S	Trimethoprim	35.8974	0	1.26121	0.863	train
PS-13-S	Sulfadiazine	37.037	0	0.487118	0.833	test
PS-14-S	α-Hexachlorocyclohexane	33.3333	0	4.09196	2.907	train
PS-15-S	Perfluoropentanoic acid	29.4118	0	2.53057	2.432	train
PS-16-S	Perfluorohexanoic acid	30	0	3.11387	1.76	train
PS-17-S	Perfluoroheptanoic acid	30.4348	0	3.65775	1.731	test
PS-18-S	Perfluorodecanoic acid	31.25	1	5.12156	2.669	train
PS-19-S	Pentadecafluorooctanoic acid	30.7692	0	4.17019	3.22	train
PS-20-S	Heptadecafluorooctanesulfonamide	25.8065	0	3.47319	2.147	test
PS-21-S	Perfluoro-1-octanesulfonyl fluoride	27.5862	0	4.42985	2.792	train
PS-22-S	Perfluoroundecanoic acid	31.4286	1	5.56762	2.752	train
PS-23-S	Perfluorododecanoic acid	31.5789	1	5.99737	2.72	test
PS-24-S	Pentacosafluorotridecanoic acid	31.7073	1	6.4127	3.162	train
PS-25-S	Perfluorotetradecanoic acid	31.8182	1	6.8152	3.088	train

## Sheet: Global Dataset 1
Global dataset 1	PE+PP+PS in sea water
			indicator variables					descriptors					end points
comp no	compound name	ind1(pe)	ind2(pp)	ind3(ps)		C%	B10[C-F]	F07[C-C]	F08[Cl-Cl]	BLTD48	ind1(pe)	ind2(pp)	logKD	set
PE-1-S	2,4,4′-trichlorobiphenyl	1	0	0		54.5455	0	1	0	-6.51793	1	0	6.15	test
PE-2-S	2,4′,5-trichlorobiphenyl	1	0	0		54.5455	0	1	1	-6.51793	1	0	6	train
PE-3-S	2,2′,3,5′-tetrachlorobiphenyl	1	0	0		54.5455	0	1	0	-7.00945	1	0	5.89	train
PE-4-S	2,2′,5,5′-tetrachlorobiphenyl	1	0	0		54.5455	0	1	0	-7.00945	1	0	5.9	train
PE-5-S	2,4,4′,5-tetrachlorobiphenyl	1	0	0		54.5455	0	1	1	-7.00945	1	0	6.66	train
PE-6-S	2,3′,4,4′-tetrachlorobiphenyl	1	0	0		54.5455	0	1	1	-7.00945	1	0	6.69	train
PE-7-S	2,2′,4,5,6′-pentachlorobiphenyl	1	0	0		54.5455	0	1	0	-7.24051	1	0	6.19	train
PE-8-S	2,3,3′,4,4′-pentachlorobiphenyl	1	0	0		54.5455	0	1	2	-7.24051	1	0	6.97	train
PE-9-S	2,3′,4,4′,5-pentachlorobiphenyl	1	0	0		54.5455	0	1	2	-7.24051	1	0	7	test
PE-10-S	3,3′,4,4′,5-pentachlorobiphenyl	1	0	0		54.5455	0	1	3	-7.24051	1	0	7.78	test
PE-11-S	3,3′,4,4′,5,5′-hexachlorobiphenyl	1	0	0		54.5455	0	1	4	-7.46621	1	0	8.84	train
PE-12-S	2,2′,3,4′,5,6-hexachlorobiphenyl	1	0	0		54.5455	0	1	2	-7.46621	1	0	6.79	train
PE-13-S	2,2′,3,4,4′,5′-hexachlorobiphenyl	1	0	0		54.5455	0	1	2	-7.46621	1	0	7.25	test
PE-14-S	2,2′,4,4′,5,5′-hexachlorobiphenyl	1	0	0		54.5455	0	1	2	-7.46621	1	0	7.65	train
PE-15-S	2,3,3′,4,4′,5-hexachlorobiphenyl	1	0	0		54.5455	0	1	3	-7.46621	1	0	7.86	train
PE-16-S	2,2′,3,3′,4,4′,5-heptachlorobiphenyl	1	0	0		54.5455	0	1	3	-7.68693	1	0	7.94	train
PE-17-S	2,2′,3,4,4′,5,5′-heptachlorobiphenyl	1	0	0		54.5455	0	1	3	-7.68693	1	0	7.94	train
PE-18-S	Dichlorodiphenyltrichloroethane	1	0	0		50	0	4	0	-7.17773	1	0	4.986	test
PE-19-S	Pentachlorobenzene	1	0	0		50	0	0	0	-5.99944	1	0	5.22	train
PE-20-S	Hexachlorobenzene	1	0	0		50	0	0	0	-6.26643	1	0	4.63	train
PE-21-S	Phenanthrene	1	0	0		58.3333	0	1	0	-5.43499	1	0	4.44	test
PE-22-S	Fluoranthene	1	0	0		61.5385	0	0	0	-5.84158	1	0	5.52	test
PE-23-S	Anthracene	1	0	0		58.3333	0	2	0	-5.43499	1	0	4.77	train
PE-24-S	Pyrene	1	0	0		61.5385	0	1	0	-5.84158	1	0	5.57	train
PE-25-S	Chrysene	1	0	0		60	0	8	0	-6.2265	1	0	6.39	test
PE-26-S	Benzoapyrene	1	0	0		62.5	0	9	0	-6.5931	1	0	7.17	train
PE-27-S	Dibenzanthracene	1	0	0		61.1111	0	17	0	-6.94392	1	0	7.87	train
PE-28-S	Benzo[g,h,i]perylene	1	0	0		64.7059	0	8	0	-6.94392	1	0	7.61	train
PE-29-S	Pentadecafluorooctanoic acid	1	0	0		30.7692	0	1	0	-5.28168	1	0	2.695	train
PE-30-S	Dioctyl phthalate	1	0	0		36.3636	0	19	0	-7.34149	1	0	4.993	train
PE-31-S	Trimethoprim	1	0	0		35.8974	0	7	0	-2.51815	1	0	0.811	train
PE-32-S	Sulfadiazine	1	0	0		37.037	0	6	0	-1.78276	1	0	0.797	train
PE-33-S	Oxytetracycline	1	0	0		38.5965	0	19	0	0.198934	1	0	0.623	test
PE-34-S	Hexachlorocyclohexane	1	0	0		33.3333	0	0	0	-5.20736	1	0	2.215	train
PP-1-S	2,3-dichlorobiphenyl	0	1	0		54.5455	0	1	0	-6.02	0	1	4.98	train
PP-2-S	2,4′-dichlorobiphenyl	0	1	0		54.5455	0	1	0	-6.02	0	1	4.98	train
PP-3-S	2,4,4′-trichlorobiohenyl	0	1	0		54.5455	0	1	0	-6.51793	0	1	5.09	train
PP-4-S	2,2′,5,5′-tetrachlorobiphenyl	0	1	0		54.5455	0	1	0	-7.00945	0	1	5.09	test
PP-5-S	2,2′,3,5′-tetrachlorobiphenyl	0	1	0		54.5455	0	1	0	-7.00945	0	1	5.14	train
PP-6-S	3,3′,4,4′-tetrachlorobiphenyl	0	1	0		54.5455	0	1	2	-7.00945	0	1	5.63	train
PP-7-S	2,3′,4,4-tetrachlorobiphenyl	0	1	0		54.5455	0	1	1	-7.00945	0	1	5.26	test
PP-8-S	2,3′,4,4′,5-pentachlorobiphenyl	0	1	0		54.5455	0	1	2	-7.24051	0	1	5.71	train
PP-9-S	2,3,3′,4,4′-pentachlorobiphenyl	0	1	0		54.5455	0	1	2	-7.24051	0	1	5.77	train
PP-10-S	2,2′,3,4′,5-pentachlorobiphenyl	0	1	0		54.5455	0	1	2	-7.24051	0	1	5.51	train
PP-11-S	2,2′,3,5′,6-pentachlorobiphenyl	0	1	0		54.5455	0	1	0	-7.24051	0	1	5.26	train
PP-12-S	2,3,3′,4′,6-pentachlorobiphenyl	0	1	0		54.5455	0	1	1	-7.24051	0	1	5.63	test
PP-13-S	2,2′,4,5,5′-pentachlorobiphenyl	0	1	0		54.5455	0	1	1	-7.24051	0	1	5.51	train
PP-14-S	2,2′,3,3′,4,6′-hexachlorobiphenyl	0	1	0		54.5455	0	1	1	-7.46621	0	1	6.19	train
PP-15-S	2,3,3′,4,5,6-hexachlorobiphenyl	0	1	0		54.5455	0	1	1	-7.46621	0	1	6.06	train
PP-16-S	2,2′,4,4′,5,5′-hexachlorobiphenyl	0	1	0		54.5455	0	1	2	-7.46621	0	1	6.19	train
PP-17-S	2,2′,3,4,4′,5-hexachlorobiphenyl	0	1	0		54.5455	0	1	2	-7.46621	0	1	5.77	test
PP-18-S	2,2′,3,3′,4,4′-hexachlorobiphenyl	0	1	0		54.5455	0	1	2	-7.46621	0	1	5.45	test
PP-19-S	2,2′,3,4′,5,5′,6-heptachlorobiphenyl	0	1	0		54.5455	0	1	2	-7.68693	0	1	5.73	train
PP-20-S	Pentachlorobenzene	0	1	0		50	0	0	0	-5.99944	0	1	4.5	train
PP-21-S	Hexachlorobenzene	0	1	0		50	0	0	0	-6.26643	0	1	5.01	train
PP-22-S	Phenanthrene	0	1	0		58.3333	0	1	0	-5.43499	0	1	4	train
PP-23-S	Fluoranthene	0	1	0		61.5385	0	0	0	-5.84158	0	1	4.79	test
PP-24-S	Anthracene	0	1	0		58.3333	0	2	0	-5.43499	0	1	4.29	train
PP-25-S	Pyrene	0	1	0		61.5385	0	1	0	-5.84158	0	1	4.8	train
PP-26-S	Chrysene	0	1	0		60	0	8	0	-6.2265	0	1	5.51	train
PP-27-S	Benzoapyrene	0	1	0		62.5	0	9	0	-6.5931	0	1	6.1	train
PP-28-S	Dibenz[a,h]anthracene	0	1	0		61.1111	0	17	0	-6.94392	0	1	7	train
PP-29-S	Benzo[g,h,i]perylene	0	1	0		64.7059	0	8	0	-6.94392	0	1	6.69	test
PP-30-S	Trimethoprim	0	1	0		35.8974	0	7	0	-2.51815	0	1	0.594	train
PP-31-S	Sulfadiazine	0	1	0		37.037	0	6	0	-1.78276	0	1	0.853	test
PP-32-S	Hexachlorocyclohexane	0	1	0		33.3333	0	0	0	-5.20736	0	1	2.42	train
PS-1-S	Pentachlorobenzene	0	0	1		50	0	0	0	-5.99944	0	0	5.1	train
PS-2-S	Hexachlorobenzene	0	0	1		50	0	0	0	-6.26643	0	0	5.28	train
PS-3-S	Phenanthrene	0	0	1		58.3333	0	1	0	-5.43499	0	0	5.39	train
PS-4-S	Fluoranthene	0	0	1		61.5385	0	0	0	-5.84158	0	0	5.91	test
PS-5-S	Anthracene	0	0	1		58.3333	0	2	0	-5.43499	0	0	5.61	train
PS-6-S	Pyrene	0	0	1		61.5385	0	1	0	-5.84158	0	0	5.84	train
PS-7-S	Chrysene	0	0	1		60	0	8	0	-6.2265	0	0	6.63	train
PS-8-S	Benzo[a]pyrene	0	0	1		62.5	0	9	0	-6.5931	0	0	6.92	train
PS-9-S	Dibenz[a,h]anthracene	0	0	1		61.1111	0	17	0	-6.94392	0	0	7.52	train
PS-10-S	Benzo[g,h,i]perylene	0	0	1		64.7059	0	8	0	-6.94392	0	0	7.15	train
PS-11-S	4-Fluorobenzoic acid	0	0	1		46.6667	0	0	0	-3.35013	0	0	2.134	test
PS-12-S	Trimethoprim	0	0	1		35.8974	0	7	0	-2.51815	0	0	0.863	train
PS-13-S	Sulfadiazine	0	0	1		37.037	0	6	0	-1.78276	0	0	0.833	train
PS-14-S	α-Hexachlorocyclohexane	0	0	1		33.3333	0	0	0	-5.20736	0	0	2.907	train
PS-15-S	Perfluoropentanoic acid	0	0	1		29.4118	0	0	0	-3.72404	0	0	2.432	test
PS-16-S	Perfluorohexanoic acid	0	0	1		30	0	0	0	-4.27818	0	0	1.76	train
PS-17-S	Perfluoroheptanoic acid	0	0	1		30.4348	0	0	0	-4.79486	0	0	1.731	train
PS-18-S	Perfluorodecanoic acid	0	0	1		31.25	1	3	0	-6.18548	0	0	2.669	train
PS-19-S	Pentadecafluorooctanoic acid	0	0	1		30.7692	0	1	0	-5.28168	0	0	3.22	train
PS-20-S	Heptadecafluorooctanesulfonamide	0	0	1		25.8065	0	1	0	-4.61953	0	0	2.147	train
PS-21-S	Perfluoro-1-octanesulfonyl fluoride	0	0	1		27.5862	0	1	0	-5.52836	0	0	2.792	train
PS-22-S	Perfluoroundecanoic acid	0	0	1		31.4286	1	4	0	-6.60924	0	0	2.752	test
PS-23-S	Perfluorododecanoic acid	0	0	1		31.5789	1	5	0	-7.0175	0	0	2.72	train
PS-24-S	Pentacosafluorotridecanoic acid	0	0	1		31.7073	1	6	0	-7.41207	0	0	3.162	test
PS-25-S	Perfluorotetradecanoic acid	0	0	1		31.8182	1	7	0	-7.79444	0	0	3.088	train

## Sheet: Global Dataset 2
Global data set 2	PE in Sea water +pure water + fresh water
			indicator variables						descriptors				end points
comp no	compound name	ind1(sea water)	ind2(fresh water)	ind3(pure water)		nHet	H-047	SaaaC	B03[N-O]	F07[O-F]	F08[Cl-Cl]	MLOGP2	logKD	set
PE-1-S	2,4,4′-trichlorobiphenyl	1	0	0		3	7	0	0	0	0	29.9373	6.15	test
PE-2-S	2,4′,5-trichlorobiphenyl	1	0	0		3	7	0	0	0	1	29.9373	6	train
PE-3-S	2,2′,3,5′-tetrachlorobiphenyl	1	0	0		4	6	0	0	0	0	35.8668	5.89	train
PE-4-S	2,2′,5,5′-tetrachlorobiphenyl	1	0	0		4	6	0	0	0	0	35.8668	5.9	train
PE-5-S	2,4,4′,5-tetrachlorobiphenyl	1	0	0		4	6	0	0	0	1	35.8668	6.66	train
PE-6-S	2,3′,4,4′-tetrachlorobiphenyl	1	0	0		4	6	0	0	0	1	35.8668	6.69	train
PE-7-S	2,2′,4,5,6′-pentachlorobiphenyl	1	0	0		5	5	0	0	0	0	38.8393	6.19	train
PE-8-S	2,3,3′,4,4′-pentachlorobiphenyl	1	0	0		5	5	0	0	0	2	38.8393	6.97	train
PE-9-S	2,3′,4,4′,5-pentachlorobiphenyl	1	0	0		5	5	0	0	0	2	38.8393	7	train
PE-10-S	3,3′,4,4′,5-pentachlorobiphenyl	1	0	0		5	5	0	0	0	3	38.8393	7.78	train
PE-11-S	3,3′,4,4′,5,5′-hexachlorobiphenyl	1	0	0		6	4	0	0	0	4	41.8569	8.84	train
PE-12-S	2,2′,3,4′,5,6-hexachlorobiphenyl	1	0	0		6	4	0	0	0	2	41.8569	6.79	train
PE-13-S	2,2′,3,4,4′,5′-hexachlorobiphenyl	1	0	0		6	4	0	0	0	2	41.8569	7.25	train
PE-14-S	2,2′,4,4′,5,5′-hexachlorobiphenyl	1	0	0		6	4	0	0	0	2	41.8569	7.65	train
PE-15-S	2,3,3′,4,4′,5-hexachlorobiphenyl	1	0	0		6	4	0	0	0	3	41.8569	7.86	train
PE-16-S	2,2′,3,3′,4,4′,5-heptachlorobiphenyl	1	0	0		7	3	0	0	0	3	44.9173	7.94	train
PE-17-S	2,2′,3,4,4′,5,5′-heptachlorobiphenyl	1	0	0		7	3	0	0	0	3	44.9173	7.94	test
PE-18-S	Dichlorodiphenyltrichloroethane	1	0	0		5	8	0	0	0	0	38.02	4.986	train
PE-19-S	Pentachlorobenzene	1	0	0		5	1	0	0	0	0	24.2628	5.22	train
PE-20-S	Hexachlorobenzene	1	0	0		6	0	0	0	0	0	27.1104	4.63	train
PE-21-S	Phenanthrene	1	0	0		0	10	5.29963	0	0	0	18.7625	4.44	train
PE-22-S	Fluoranthene	1	0	0		0	10	2.74759	0	0	0	22.6534	5.52	train
PE-23-S	Anthracene	1	0	0		0	10	5.24519	0	0	0	18.7625	4.77	test
PE-24-S	Pyrene	1	0	0		0	10	8.14204	0	0	0	22.6534	5.57	train
PE-25-S	Chrysene	1	0	0		0	12	7.95895	0	0	0	26.6745	6.39	test
PE-26-S	Benzoapyrene	1	0	0		0	12	10.8207	0	0	0	30.8095	7.17	train
PE-27-S	Dibenzanthracene	1	0	0		0	14	10.6227	0	0	0	35.0455	7.87	train
PE-28-S	Benzo[g,h,i]perylene	1	0	0		0	12	13.7871	0	0	0	35.0455	7.61	train
PE-29-S	Pentadecafluorooctanoic acid	1	0	0		17	0	0	0	4	0	17.3905	2.695	train
PE-30-S	Dioctyl phthalate	1	0	0		4	8	0	0	0	0	40.1754	4.993	train
PE-31-S	Trimethoprim	1	0	0		7	11	0	0	0	0	1.59064	0.811	train
PE-32-S	Sulfadiazine	1	0	0		7	5	0	0	0	0	0.237284	0.797	train
PE-33-S	Oxytetracycline	1	0	0		11	11	0	1	0	0	2.55641	0.623	train
PE-34-S	Hexachlorocyclohexane	1	0	0		6	6	0	0	0	0	16.7441	2.215	train
PE-1-F	2,4,4′-trichlorobiphenyl	0	1	0		3	7	0	0	0	0	29.9373	5.35	test
PE-2-F	2,4′,5-trichlorobiphenyl	0	1	0		3	7	0	0	0	1	29.9373	5.11	test
PE-3-F	2,2′,3,5′-tetrachlorobiphenyl	0	1	0		4	6	0	0	0	0	35.8668	4.92	test
PE-4-F	2,2′,5,5′-tetrachlorobiphenyl	0	1	0		4	6	0	0	0	0	35.8668	5.01	test
PE-5-F	2,4,4′,5-tetrachlorobiphenyl	0	1	0		4	6	0	0	0	1	35.8668	5.89	train
PE-6-F	2,3′,4,4′-tetrachlorobiphenyl	0	1	0		4	6	0	0	0	1	35.8668	6.17	train
PE-7-F	3,3′,4,4′-tetrachlorobiphenyl	0	1	0		4	6	0	0	0	2	35.8668	6.62	train
PE-8-F	2,2′,4,5,6′-pentachlorobiphenyl	0	1	0		5	5	0	0	0	0	38.8393	5.61	train
PE-9-F	2,3,3′,4,4′-pentachlorobiphenyl	0	1	0		5	5	0	0	0	2	38.8393	6.35	train
PE-10-F	2,3′,4,4′,5-pentachlorobiphenyl	0	1	0		5	5	0	0	0	2	38.8393	6.36	train
PE-11-F	3,3′,4,4′,5-pentachlorobiphenyl	0	1	0		5	5	0	0	0	3	38.8393	6.94	test
PE-12-F	3,3′,4,4′,5,5′-hexachlorobiphenyl	0	1	0		6	4	0	0	0	4	41.8569	8.78	test
PE-13-F	2,2′,3,4′,5,6-hexachlorobiphenyl	0	1	0		6	4	0	0	0	2	41.8569	6.18	test
PE-14-F	2,2′,3,4,4′,5′-hexachlorobiphenyl	0	1	0		6	4	0	0	0	2	41.8569	6.89	test
PE-15-F	2,2′,4,4′,5,5′-hexachlorobiphenyl	0	1	0		6	4	0	0	0	2	41.8569	7.04	test
PE-16-F	2,3,3′,4,4′,5-hexachlorobiphenyl	0	1	0		6	4	0	0	0	3	41.8569	7.17	test
PE-17-F	2,2′,3,4,4′,5-hexachlorobiphenyl	0	1	0		6	4	0	0	0	2	41.8569	6.92	test
PE-18-F	2,2′,3,4′,5′,6-hexachlorobiphenyl	0	1	0		6	4	0	0	0	1	41.8569	6.24	train
PE-19-F	2,2′,3,3′,4,4′,5-heptachlorobiphenyl	0	1	0		7	3	0	0	0	3	44.9173	7.29	test
PE-20-F	2,2′,3,4,4′,5,5′-heptachlorobiphenyl	0	1	0		7	3	0	0	0	3	44.9173	7.39	test
PE-21-F	Ciprofloxacin	0	1	0		7	11	0	0	2	0	2.79078	1.741	train
PE-22-F	Trimethoprim	0	1	0		7	11	0	0	0	0	1.59064	0.923	train
PE-23-F	Sulfadiazine	0	1	0		7	5	0	0	0	0	0.237284	0.792	train
PE-24-F	Amoxicillin	0	1	0		9	7	0	1	0	0	0.338033	0.924	train
PE-1-P	2,2′,5-trichlorobiphenyl	0	0	1		3	7	0	0	0	0	29.9373	4.9	train
PE-2-P	2,4,4′-trichlorobiphenyl	0	0	1		3	7	0	0	0	0	29.9373	5.4	train
PE-3-P	2,4′,5-trichlorobiphenyl	0	0	1		3	7	0	0	0	1	29.9373	5.301	train
PE-4-P	2,2′,4,4′-tetrachlorobiphenyl	0	0	1		4	6	0	0	0	0	35.8668	5.083	train
PE-5-P	2,2′,5,5′-tetrachlorobiphenyl	0	0	1		4	6	0	0	0	0	35.8668	5.5	test
PE-6-P	2,2′,3,5-tetrachlorobiphenyl	0	0	1		4	6	0	0	0	0	35.8668	5.5	test
PE-7-P	2,3′,4,4′-tetrachlorobiphenyl	0	0	1		4	6	0	0	0	1	35.8668	5.9	train
PE-8-P	2,2′,4,5,5′-pentachlorobiphenyl	0	0	1		5	5	0	0	0	1	38.8393	6.2	train
PE-9-P	2,3,3′,4′,6-pentachlorobiphenyl	0	0	1		5	5	0	0	0	1	38.8393	6.1	train
PE-10-P	2,3′,4,4′,5-pentachlorobiphenyl	0	0	1		5	5	0	0	0	2	38.8393	6.4	train
PE-11-P	2,3,3′,4,4′-pentachlorobiphenyl	0	0	1		5	5	0	0	0	2	38.8393	6.3	train
PE-12-P	2,2′,4,5′,6-pentachlorobiphenyl	0	0	1		5	5	0	0	0	1	38.8393	5.019	train
PE-13-P	2,2′,4,4′,5,5′-hexachlorobiphenyl	0	0	1		6	4	0	0	0	2	41.8569	6.4	train
PE-14-P	2,2′,3,4,4′,5′-hexachlorobiphenyl	0	0	1		6	4	0	0	0	2	41.8569	6.6	train
PE-15-P	2,2′,3,3′,4,5-hexachlorobiphenyl	0	0	1		6	4	0	0	0	1	41.8569	6.6	test
PE-16-P	2,2′,3,3′,4,4′-hexachlorobiphenyl	0	0	1		6	4	0	0	0	2	41.8569	6.5	train
PE-17-P	2,2′,3,4′,5,5′,6-heptachlorobiphenyl	0	0	1		7	3	0	0	0	2	44.9173	7.1	test
PE-18-P	2,2′,3,4,4′,5,5′-heptachlorobiphenyl	0	0	1		7	3	0	0	0	3	44.9173	7	train
PE-19-P	2,2′,3,3′,4,4′,5-heptachlorobiphenyl	0	0	1		7	3	0	0	0	3	44.9173	6.9	test
PE-20-P	Chlorobenzene	0	0	1		1	5	0	0	0	0	8.2722	3.08	train
PE-21-P	Benzene	0	0	1		0	6	0	0	0	0	5.08467	2.19	train
PE-22-P	Toluene	0	0	1		0	5	0	0	0	0	6.80241	2.91	train
PE-23-P	Ethyl benzoate	0	0	1		2	7	0	0	0	0	5.52589	2.81	train
PE-24-P	Naphthalene	0	0	1		0	8	2.62037	0	0	0	11.4649	3.77	test
PE-25-P	2-Methylanthracene	0	0	1		0	9	5.27542	0	0	0	21.047	5	test
PE-26-P	1-methylphenanthrene	0	0	1		0	9	5.3737	0	0	0	21.047	4.7	test
PE-27-P	9,10-Dimethylanthracene	0	0	1		0	8	5.49519	0	0	0	23.3975	5.3	test
PE-28-P	3,6-dimethylphenanthrene	0	0	1		0	8	5.37019	0	0	0	23.3975	5.2	test
PE-29-P	Phenanthrene	0	0	1		0	10	5.29963	0	0	0	18.7625	4.3	test
PE-30-P	Anthracene	0	0	1		0	10	5.24519	0	0	0	18.7625	4.3	test
PE-31-P	Oxytetracycline	0	0	1		11	11	0	1	0	0	2.55641	1.176	train
PE-32-P	Phenylalanine	0	0	1		3	6	0	1	0	0	0.937139	3.519	train
PE-33-P	Cyclohexane	0	0	1		0	0	0	0	0	0	9.76009	3.88	train
PE-34-P	Hexane	0	0	1		0	0	0	0	0	0	12.3631	4.5	train
PE-35-P	Carbamazepine	0	0	1		3	10	0	0	0	0	6.70083	2.281	train
PE-36-P	3-(4-methylbenzylidene)camphor	0	0	1		1	5	0	0	0	0	16.5747	4.726	train
PE-37-P	Triclosan	0	0	1		5	6	0	0	0	1	14.7587	3.711	train
PE-38-P	Sulfamethoxazole	0	0	1		7	5	0	1	0	0	0.942176	2.845	train
PE-39-P	Propanolol	0	0	1		3	13	2.22575	1	0	0	6.42033	3.362	train
PE-40-P	Sertraline	0	0	1		3	11	0	0	0	0	26.5126	3.522	train
PE-41-P	p,p’-DDT	0	0	1		5	8	0	0	0	0	38.02	5.59	train
PE-42-P	o,p’-DDT	0	0	1		5	8	0	0	0	1	38.02	5.76	test
PE-43-P	p,p’-DDD	0	0	1		4	8	0	0	0	0	35.2087	4.89	test
PE-44-P	o,p’-DDD	0	0	1		4	8	0	0	0	1	35.2087	4.94	train
PE-45-P	p,p’-DDE	0	0	1		4	8	0	0	0	0	34.2681	5.77	train
PE-46-P	o,p’-DDE	0	0	1		4	8	0	0	0	1	34.2681	5.62	test
PE-47-P	p,p’-DDMU	0	0	1		3	8	0	0	0	0	31.5431	5.37	train

## Sheet: Global Dataset 3
Global data set 3	PE+PP+PS in Sea water +pure water + fresh water
					indicator variables						descriptors				end point
compound no	organic compound	ind1(pe)	ind2(pp)	ind3(ps)	ind4(sea )	ind5(fresh)	ind6(pure)		ind2(pp)	nHet	SaaaC	F07[C-N]	F08[Cl-Cl]	MLOGP2	logkd	set
PE-1-S	2,4,4′-trichlorobiphenyl	1	0	0	1	0	0		0	3	0	0	0	29.9373	6.15	train
PE-2-S	2,4′,5-trichlorobiphenyl	1	0	0	1	0	0		0	3	0	0	1	29.9373	6	train
PE-3-S	2,2′,3,5′-tetrachlorobiphenyl	1	0	0	1	0	0		0	4	0	0	0	35.8668	5.89	test
PE-4-S	2,2′,5,5′-tetrachlorobiphenyl	1	0	0	1	0	0		0	4	0	0	0	35.8668	5.9	train
PE-5-S	2,4,4′,5-tetrachlorobiphenyl	1	0	0	1	0	0		0	4	0	0	1	35.8668	6.66	train
PE-6-S	2,3′,4,4′-tetrachlorobiphenyl	1	0	0	1	0	0		0	4	0	0	1	35.8668	6.69	train
PE-7-S	2,2′,4,5,6′-pentachlorobiphenyl	1	0	0	1	0	0		0	5	0	0	0	38.8393	6.19	train
PE-8-S	2,3,3′,4,4′-pentachlorobiphenyl	1	0	0	1	0	0		0	5	0	0	2	38.8393	6.97	test
PE-9-S	2,3′,4,4′,5-pentachlorobiphenyl	1	0	0	1	0	0		0	5	0	0	2	38.8393	7	train
PE-10-S	3,3′,4,4′,5-pentachlorobiphenyl	1	0	0	1	0	0		0	5	0	0	3	38.8393	7.78	train
PE-11-S	3,3′,4,4′,5,5′-hexachlorobiphenyl	1	0	0	1	0	0		0	6	0	0	4	41.8569	8.84	test
PE-12-S	2,2′,3,4′,5,6-hexachlorobiphenyl	1	0	0	1	0	0		0	6	0	0	2	41.8569	6.79	train
PE-13-S	2,2′,3,4,4′,5′-hexachlorobiphenyl	1	0	0	1	0	0		0	6	0	0	2	41.8569	7.25	train
PE-14-S	2,2′,4,4′,5,5′-hexachlorobiphenyl	1	0	0	1	0	0		0	6	0	0	2	41.8569	7.65	test
PE-15-S	2,3,3′,4,4′,5-hexachlorobiphenyl	1	0	0	1	0	0		0	6	0	0	3	41.8569	7.86	train
PE-16-S	2,2′,3,3′,4,4′,5-heptachlorobiphenyl	1	0	0	1	0	0		0	7	0	0	3	44.9173	7.94	train
PE-17-S	2,2′,3,4,4′,5,5′-heptachlorobiphenyl	1	0	0	1	0	0		0	7	0	0	3	44.9173	7.94	test
PE-18-S	Dichlorodiphenyltrichloroethane	1	0	0	1	0	0		0	5	0	0	0	38.02	4.986	test
PE-19-S	Pentachlorobenzene	1	0	0	1	0	0		0	5	0	0	0	24.2628	5.22	train
PE-20-S	Hexachlorobenzene	1	0	0	1	0	0		0	6	0	0	0	27.1104	4.63	train
PE-21-S	Phenanthrene	1	0	0	1	0	0		0	0	5.29963	0	0	18.7625	4.44	train
PE-22-S	Fluoranthene	1	0	0	1	0	0		0	0	2.74759	0	0	22.6534	5.52	test
PE-23-S	Anthracene	1	0	0	1	0	0		0	0	5.24519	0	0	18.7625	4.77	train
PE-24-S	Pyrene	1	0	0	1	0	0		0	0	8.14204	0	0	22.6534	5.57	train
PE-25-S	Chrysene	1	0	0	1	0	0		0	0	7.95895	0	0	26.6745	6.39	test
PE-26-S	Benzoapyrene	1	0	0	1	0	0		0	0	10.8207	0	0	30.8095	7.17	train
PE-27-S	Dibenzanthracene	1	0	0	1	0	0		0	0	10.6227	0	0	35.0455	7.87	train
PE-28-S	Benzo[g,h,i]perylene	1	0	0	1	0	0		0	0	13.7871	0	0	35.0455	7.61	train
PE-29-S	Pentadecafluorooctanoic acid	1	0	0	1	0	0		0	17	0	0	0	17.3905	2.695	test
PE-30-S	Dioctyl phthalate	1	0	0	1	0	0		0	4	0	0	0	40.1754	4.993	train
PE-31-S	Trimethoprim	1	0	0	1	0	0		0	7	0	5	0	1.59064	0.811	train
PE-32-S	Sulfadiazine	1	0	0	1	0	0		0	7	0	3	0	0.237284	0.797	train
PE-33-S	Oxytetracycline	1	0	0	1	0	0		0	11	0	4	0	2.55641	0.623	train
PE-34-S	Hexachlorocyclohexane	1	0	0	1	0	0		0	6	0	0	0	16.7441	2.215	train
PP-1-S	2,3-dichlorobiphenyl	0	1	0	1	0	0		1	2	0	0	0	24.4764	4.98	train
PP-2-S	2,4′-dichlorobiphenyl	0	1	0	1	0	0		1	2	0	0	0	24.4764	4.98	train
PP-3-S	2,4,4′-trichlorobiohenyl	0	1	0	1	0	0		1	3	0	0	0	29.9373	5.09	test
PP-4-S	2,2′,5,5′-tetrachlorobiphenyl	0	1	0	1	0	0		1	4	0	0	0	35.8668	5.09	train
PP-5-S	2,2′,3,5′-tetrachlorobiphenyl	0	1	0	1	0	0		1	4	0	0	0	35.8668	5.14	train
PP-6-S	3,3′,4,4′-tetrachlorobiphenyl	0	1	0	1	0	0		1	4	0	0	2	35.8668	5.63	train
PP-7-S	2,3′,4,4-tetrachlorobiphenyl	0	1	0	1	0	0		1	4	0	0	1	35.8668	5.26	train
PP-8-S	2,3′,4,4′,5-pentachlorobiphenyl	0	1	0	1	0	0		1	5	0	0	2	38.8393	5.71	test
PP-9-S	2,3,3′,4,4′-pentachlorobiphenyl	0	1	0	1	0	0		1	5	0	0	2	38.8393	5.77	test
PP-10-S	2,2′,3,4′,5-pentachlorobiphenyl	0	1	0	1	0	0		1	5	0	0	2	38.8393	5.51	train
PP-11-S	2,2′,3,5′,6-pentachlorobiphenyl	0	1	0	1	0	0		1	5	0	0	0	38.8393	5.26	train
PP-12-S	2,3,3′,4′,6-pentachlorobiphenyl	0	1	0	1	0	0		1	5	0	0	1	38.8393	5.63	train
PP-13-S	2,2′,4,5,5′-pentachlorobiphenyl	0	1	0	1	0	0		1	5	0	0	1	38.8393	5.51	train
PP-14-S	2,2′,3,3′,4,6′-hexachlorobiphenyl	0	1	0	1	0	0		1	6	0	0	1	41.8569	6.19	train
PP-15-S	2,3,3′,4,5,6-hexachlorobiphenyl	0	1	0	1	0	0		1	6	0	0	1	41.8569	6.06	test
PP-16-S	2,2′,4,4′,5,5′-hexachlorobiphenyl	0	1	0	1	0	0		1	6	0	0	2	41.8569	6.19	train
PP-17-S	2,2′,3,4,4′,5-hexachlorobiphenyl	0	1	0	1	0	0		1	6	0	0	2	41.8569	5.77	train
PP-18-S	2,2′,3,3′,4,4′-hexachlorobiphenyl	0	1	0	1	0	0		1	6	0	0	2	41.8569	5.45	train
PP-19-S	2,2′,3,4′,5,5′,6-heptachlorobiphenyl	0	1	0	1	0	0		1	7	0	0	2	44.9173	5.73	test
PP-20-S	Pentachlorobenzene	0	1	0	1	0	0		1	5	0	0	0	24.2628	4.5	test
PP-21-S	Hexachlorobenzene	0	1	0	1	0	0		1	6	0	0	0	27.1104	5.01	train
PP-22-S	Phenanthrene	0	1	0	1	0	0		1	0	5.29963	0	0	18.7625	4	train
PP-23-S	Fluoranthene	0	1	0	1	0	0		1	0	2.74759	0	0	22.6534	4.79	train
PP-24-S	Anthracene	0	1	0	1	0	0		1	0	5.24519	0	0	18.7625	4.29	train
PP-25-S	Pyrene	0	1	0	1	0	0		1	0	8.14204	0	0	22.6534	4.8	test
PP-26-S	Chrysene	0	1	0	1	0	0		1	0	7.95895	0	0	26.6745	5.51	train
PP-27-S	Benzoapyrene	0	1	0	1	0	0		1	0	10.8207	0	0	30.8095	6.1	test
PP-28-S	Dibenz[a,h]anthracene	0	1	0	1	0	0		1	0	10.5438	0	0	35.0455	7	test
PP-29-S	Benzo[g,h,i]perylene	0	1	0	1	0	0		1	0	13.7871	0	0	35.0455	6.69	test
PP-30-S	Trimethoprim	0	1	0	1	0	0		1	7	0	5	0	1.59064	0.594	test
PP-31-S	Sulfadiazine	0	1	0	1	0	0		1	7	0	3	0	0.237284	0.853	train
PP-32-S	Hexachlorocyclohexane	0	1	0	1	0	0		1	6	0	0	0	16.7441	2.42	train
PS-1-S	Pentachlorobenzene	0	0	1	1	0	0		0	5	0	0	0	24.2628	5.1	train
PS-2-S	Hexachlorobenzene	0	0	1	1	0	0		0	6	0	0	0	27.1104	5.28	test
PS-3-S	Phenanthrene	0	0	1	1	0	0		0	0	5.29963	0	0	18.7625	5.39	test
PS-4-S	Fluoranthene	0	0	1	1	0	0		0	0	2.74759	0	0	22.6534	5.91	train
PS-5-S	Anthracene	0	0	1	1	0	0		0	0	5.24519	0	0	18.7625	5.61	test
PS-6-S	Pyrene	0	0	1	1	0	0		0	0	8.14204	0	0	22.6534	5.84	train
PS-7-S	Chrysene	0	0	1	1	0	0		0	0	7.95895	0	0	26.6745	6.63	train
PS-8-S	Benzo[a]pyrene	0	0	1	1	0	0		0	0	10.8207	0	0	30.8095	6.92	train
PS-9-S	Dibenz[a,h]anthracene	0	0	1	1	0	0		0	0	10.5438	0	0	35.0455	7.52	train
PS-10-S	Benzo[g,h,i]perylene	0	0	1	1	0	0		0	0	13.7871	0	0	35.0455	7.15	train
PS-11-S	4-Fluorobenzoic acid	0	0	1	1	0	0		0	3	0	0	0	4.56667	2.134	train
PS-12-S	Trimethoprim	0	0	1	1	0	0		0	7	0	5	0	1.59064	0.863	train
PS-13-S	Sulfadiazine	0	0	1	1	0	0		0	7	0	3	0	0.237284	0.833	test
PS-14-S	α-Hexachlorocyclohexane	0	0	1	1	0	0		0	6	0	0	0	16.7441	2.907	test
PS-15-S	Perfluoropentanoic acid	0	0	1	1	0	0		0	11	0	0	0	6.40378	2.432	test
PS-16-S	Perfluorohexanoic acid	0	0	1	1	0	0		0	13	0	0	0	9.6962	1.76	train
PS-17-S	Perfluoroheptanoic acid	0	0	1	1	0	0		0	15	0	0	0	13.3791	1.731	train
PS-18-S	Perfluorodecanoic acid	0	0	1	1	0	0		0	21	0	0	0	26.2304	2.669	test
PS-19-S	Pentadecafluorooctanoic acid	0	0	1	1	0	0		0	17	0	0	0	17.3905	3.22	train
PS-20-S	Heptadecafluorooctanesulfonamide	0	0	1	1	0	0		0	21	0	1	0	12.0631	2.147	train
PS-21-S	Perfluoro-1-octanesulfonyl fluoride	0	0	1	1	0	0		0	21	0	0	0	19.6236	2.792	train
PS-22-S	Perfluoroundecanoic acid	0	0	1	1	0	0		0	23	0	0	0	30.9984	2.752	train
PS-23-S	Perfluorododecanoic acid	0	0	1	1	0	0		0	25	0	0	0	35.9684	2.72	test
PS-24-S	Pentacosafluorotridecanoic acid	0	0	1	1	0	0		0	27	0	0	0	41.1228	3.162	train
PS-25-S	Perfluorotetradecanoic acid	0	0	1	1	0	0		0	29	0	0	0	46.4469	3.088	train
PE-1-F	2,4,4′-trichlorobiphenyl	1	0	0	0	1	0		0	3	0	0	0	29.9373	5.35	train
PE-2-F	2,4′,5-trichlorobiphenyl	1	0	0	0	1	0		0	3	0	0	1	29.9373	5.11	test
PE-3-F	2,2′,3,5′-tetrachlorobiphenyl	1	0	0	0	1	0		0	4	0	0	0	35.8668	4.92	train
PE-4-F	2,2′,5,5′-tetrachlorobiphenyl	1	0	0	0	1	0		0	4	0	0	0	35.8668	5.01	test
PE-5-F	2,4,4′,5-tetrachlorobiphenyl	1	0	0	0	1	0		0	4	0	0	1	35.8668	5.89	train
PE-6-F	2,3′,4,4′-tetrachlorobiphenyl	1	0	0	0	1	0		0	4	0	0	1	35.8668	6.17	test
PE-7-F	3,3′,4,4′-tetrachlorobiphenyl	1	0	0	0	1	0		0	4	0	0	2	35.8668	6.62	train
PE-8-F	2,2′,4,5,6′-pentachlorobiphenyl	1	0	0	0	1	0		0	5	0	0	0	38.8393	5.61	train
PE-9-F	2,3,3′,4,4′-pentachlorobiphenyl	1	0	0	0	1	0		0	5	0	0	2	38.8393	6.35	train
PE-10-F	2,3′,4,4′,5-pentachlorobiphenyl	1	0	0	0	1	0		0	5	0	0	2	38.8393	6.36	train
PE-11-F	3,3′,4,4′,5-pentachlorobiphenyl	1	0	0	0	1	0		0	5	0	0	3	38.8393	6.94	train
PE-12-F	3,3′,4,4′,5,5′-hexachlorobiphenyl	1	0	0	0	1	0		0	6	0	0	4	41.8569	8.78	train
PE-13-F	2,2′,3,4′,5,6-hexachlorobiphenyl	1	0	0	0	1	0		0	6	0	0	2	41.8569	6.18	test
PE-14-F	2,2′,3,4,4′,5′-hexachlorobiphenyl	1	0	0	0	1	0		0	6	0	0	2	41.8569	6.89	train
PE-15-F	2,2′,4,4′,5,5′-hexachlorobiphenyl	1	0	0	0	1	0		0	6	0	0	2	41.8569	7.04	train
PE-16-F	2,3,3′,4,4′,5-hexachlorobiphenyl	1	0	0	0	1	0		0	6	0	0	3	41.8569	7.17	train
PE-17-F	2,2′,3,4,4′,5-hexachlorobiphenyl	1	0	0	0	1	0		0	6	0	0	2	41.8569	6.92	train
PE-18-F	2,2′,3,4′,5′,6-hexachlorobiphenyl	1	0	0	0	1	0		0	6	0	0	1	41.8569	6.24	train
PE-19-F	2,2′,3,3′,4,4′,5-heptachlorobiphenyl	1	0	0	0	1	0		0	7	0	0	3	44.9173	7.29	train
PE-20-F	2,2′,3,4,4′,5,5′-heptachlorobiphenyl	1	0	0	0	1	0		0	7	0	0	3	44.9173	7.39	train
PE-21-F	Ciprofloxacin	1	0	0	0	1	0		0	7	0	2	0	2.79078	1.741	train
PE-22-F	Trimethoprim	1	0	0	0	1	0		0	7	0	5	0	1.59064	0.923	train
PE-23-F	Sulfadiazine	1	0	0	0	1	0		0	7	0	3	0	0.237284	0.792	train
PE-24-F	Amoxicillin	1	0	0	0	1	0		0	9	0	4	0	0.338033	0.924	train
PE-1-P	2,2′,5-trichlorobiphenyl	1	0	0	0	0	1		0	3	0	0	0	29.9373	4.9	train
PE-2-P	2,4,4′-trichlorobiphenyl	1	0	0	0	0	1		0	3	0	0	0	29.9373	5.4	train
PE-3-P	2,4′,5-trichlorobiphenyl	1	0	0	0	0	1		0	3	0	0	1	29.9373	5.301	train
PE-4-P	2,2′,4,4′-tetrachlorobiphenyl	1	0	0	0	0	1		0	4	0	0	0	35.8668	5.083	test
PE-5-P	2,2′,5,5′-tetrachlorobiphenyl	1	0	0	0	0	1		0	4	0	0	0	35.8668	5.5	train
PE-6-P	2,2′,3,5-tetrachlorobiphenyl	1	0	0	0	0	1		0	4	0	0	0	35.8668	5.5	train
PE-7-P	2,3′,4,4′-tetrachlorobiphenyl	1	0	0	0	0	1		0	4	0	0	1	35.8668	5.9	train
PE-8-P	2,2′,4,5,5′-pentachlorobiphenyl	1	0	0	0	0	1		0	5	0	0	1	38.8393	6.2	test
PE-9-P	2,3,3′,4′,6-pentachlorobiphenyl	1	0	0	0	0	1		0	5	0	0	1	38.8393	6.1	test
PE-10-P	2,3′,4,4′,5-pentachlorobiphenyl	1	0	0	0	0	1		0	5	0	0	2	38.8393	6.4	train
PE-11-P	2,3,3′,4,4′-pentachlorobiphenyl	1	0	0	0	0	1		0	5	0	0	2	38.8393	6.3	train
PE-12-P	2,2′,4,5′,6-pentachlorobiphenyl	1	0	0	0	0	1		0	5	0	0	1	38.8393	5.019	train
PE-13-P	2,2′,4,4′,5,5′-hexachlorobiphenyl	1	0	0	0	0	1		0	6	0	0	2	41.8569	6.4	train
PE-14-P	2,2′,3,4,4′,5′-hexachlorobiphenyl	1	0	0	0	0	1		0	6	0	0	2	41.8569	6.6	test
PE-15-P	2,2′,3,3′,4,5-hexachlorobiphenyl	1	0	0	0	0	1		0	6	0	0	1	41.8569	6.6	train
PE-16-P	2,2′,3,3′,4,4′-hexachlorobiphenyl	1	0	0	0	0	1		0	6	0	0	2	41.8569	6.5	test
PE-17-P	2,2′,3,4′,5,5′,6-heptachlorobiphenyl	1	0	0	0	0	1		0	7	0	0	2	44.9173	7.1	train
PE-18-P	2,2′,3,4,4′,5,5′-heptachlorobiphenyl	1	0	0	0	0	1		0	7	0	0	3	44.9173	7	train
PE-19-P	2,2′,3,3′,4,4′,5-heptachlorobiphenyl	1	0	0	0	0	1		0	7	0	0	3	44.9173	6.9	train
PE-20-P	Chlorobenzene	1	0	0	0	0	1		0	1	0	0	0	8.2722	3.08	test
PE-21-P	Benzene	1	0	0	0	0	1		0	0	0	0	0	5.08467	2.19	train
PE-22-P	Toluene	1	0	0	0	0	1		0	0	0	0	0	6.80241	2.91	train
PE-23-P	Ethyl benzoate	1	0	0	0	0	1		0	2	0	0	0	5.52589	2.81	train
PE-24-P	Naphthalene	1	0	0	0	0	1		0	0	2.62037	0	0	11.4649	3.77	train
PE-25-P	2-Methylanthracene	1	0	0	0	0	1		0	0	5.27542	0	0	21.047	5	train
PE-26-P	1-methylphenanthrene	1	0	0	0	0	1		0	0	5.3737	0	0	21.047	4.7	train
PE-27-P	9,10-Dimethylanthracene	1	0	0	0	0	1		0	0	5.49519	0	0	23.3975	5.3	train
PE-28-P	3,6-dimethylphenanthrene	1	0	0	0	0	1		0	0	5.37019	0	0	23.3975	5.2	train
PE-29-P	Phenanthrene	1	0	0	0	0	1		0	0	5.29963	0	0	18.7625	4.3	train
PE-30-P	Anthracene	1	0	0	0	0	1		0	0	5.24519	0	0	18.7625	4.3	train
PE-31-P	Oxytetracycline	1	0	0	0	0	1		0	11	0	4	0	2.55641	1.176	train
PE-32-P	Phenylalanine	1	0	0	0	0	1		0	3	0	0	0	0.937139	3.519	train
PE-33-P	Cyclohexane	1	0	0	0	0	1		0	0	0	0	0	9.76009	3.88	train
PE-34-P	Hexane	1	0	0	0	0	1		0	0	0	0	0	12.3631	4.5	train
PE-35-P	Carbamazepine	1	0	0	0	0	1		0	3	0	0	0	6.70083	2.281	test
PE-36-P	3-(4-methylbenzylidene)camphor	1	0	0	0	0	1		0	1	0	0	0	16.5747	4.726	train
PE-37-P	Triclosan	1	0	0	0	0	1		0	5	0	0	1	14.7587	3.711	train
PE-38-P	Sulfamethoxazole	1	0	0	0	0	1		0	7	0	2	0	0.942176	2.845	train
PE-39-P	Propanolol	1	0	0	0	0	1		0	3	2.22575	3	0	6.42033	3.362	train
PE-40-P	Sertraline	1	0	0	0	0	1		0	3	0	2	0	26.5126	3.522	train
PE-41-P	p,p’-DDT	1	0	0	0	0	1		0	5	0	0	0	38.02	5.59	train
PE-42-P	o,p’-DDT	1	0	0	0	0	1		0	5	0	0	1	38.02	5.76	train
PE-43-P	p,p’-DDD	1	0	0	0	0	1		0	4	0	0	0	35.2087	4.89	train
PE-44-P	o,p’-DDD	1	0	0	0	0	1		0	4	0	0	1	35.2087	4.94	train
PE-45-P	p,p’-DDE	1	0	0	0	0	1		0	4	0	0	0	34.2681	5.77	test
PE-46-P	o,p’-DDE	1	0	0	0	0	1		0	4	0	0	1	34.2681	5.62	train
PE-47-P	p,p’-DDMU	1	0	0	0	0	1		0	3	0	0	0	31.5431	5.37	train

## Sheet: Comparative analysis
Comparative statistical analysis of QSPR and q-RASPR models
		Model	Desc	LV	F-value	R2	Q2(LOO)	Q2F1	Q2F2	MAEtest	Setting	RASAR descriptors	Outliers (h*)	Outside AD (h*)	Inference
Dataset1	QSAR	PLS	4	3	359.333	0.98	0.968	0.953	0.953	0.304			1 (# PE-31-S)	0	Outlier present in QSAR model but not in q-RASAR models
	q-RASAR	Univariate	1		255.07	0.914	0.893	0.97	0.97	0.241	LK, CTC=3, gamma=2	RA function	0	0	Univariate model provides best predictivity
	q-RASAR	PLS	4	1	437.538	0.948	0.934	0.949	0.949	0.299	LK, CTC=3, gamma=2	SD_Similarity	0	0	Same no. of descriptors, lower LV, higher F value, enhanced predictivity
	q-RASAR	MLR	4		128.24	0.961	0.939	0.964	0.964	0.226	LK, CTC=3, gamma=2	SD_Similarity	0	0	MLR produced better results compared to PLS
Dataset2	QSAR	PLS	6	5	124.435	0.954	0.912	0.966	0.965	0.216			2(# PE-31-P # PE-32-P)	1 (# PE-37-P)
	q-RASAR	Univariate	1		140.359	0.805	0.779	0.872	0.868	0.351	LK, CTC=2, gamma=2	RA function	0	0	Univariate model generates highest F value and good predictivity
	q-RASAR	PLS	6	3	167.111	0.94	0.922	0.949	0.948	0.239	LK, CTC=2, gamma=2	RA function, MaxPos, gm*Avg.Sim	3 (# PE-26-P, #PE-31-P, #PE-40-P )	2 (#PE-27-P, #PE-37-S)	Highest F-value, enhanced predictivity and internal validation statistics
	q-RASAR	MLR	6		91.8333	0.95	0.931	0.979	0.978	0.158		RA function, MaxPos, gm*Avg.Sim	3 (# PE-26-P, #PE-31-P, #PE-40-P )	2 (#PE-27-P, #PE-37-S)
Dataset3	QSAR	PLS	2	1	925.176	0.983	0.979	0.978	0.978	0.276			0	0
	q-RASAR	Univariate	1		255.186	0.941	0.921	0.982	0.981	0.248	LK, CTC=3, gamma=2	RA function	0	0	Highest predictivity
	q-RASAR	PLS	2	1	274.909	0.945	0.934	0.941	0.941	0.428	LK, CTC=3, gamma=2	sm2	0	0
	q-RASAR	MLR	2		134.009	0.947	0.932	0.955	0.954	0.354	LK, CTC=3, gamma=2	sm2	0	0	MLR produced better results compared to PLS
Dataset4	QSAR	PLS	4	3	195.354	0.967	0.942	0.94	0.94	0.353			1 (#PP-30-S)	2 (#PP-28-S, #PP-29-S)	More compounds are outside AD in QSAR
	q-RASAR	Univariate	1		70.437	0.762	0.37	0.913	0.913	0.408	GK, CTC=10, sigma=0.5	RA function	1 (#PP-32-S)	1 (#PP-31-S)
	q-RASAR	PLS	4	3	223.218	0.971	0.958	0.893	0.893	0.44	GK, CTC=10, sigma=0.5	NegAvgSim, sm1, gm_class	1 (#PP-30-S)	0	Increased robustness, increased F-value
	q-RASAR	MLR	4		177.942	0.974	0.967	0.899	0.898	0.432	GK, CTC=10, sigma=0.5	NegAvgSim, sm1, gm_class	1 (#PP-30-S)	0	MLR produced better results compared to PLS
Dataset5	QSAR	PLS	3	1	323	0.95	0.924	0.976	0.974	0.309			0	1 (#PS-13-S)	A compound is outside AD in QSAR but not in RASAR
	q-RASAR	Univariate	1		187.819	0.917	0.889	0.97	0.968	0.231	GK, CTC=10, sigma=0.25	RA function	0	0	Highest predictivity
	q-RASAR	PLS	3	1	183	0.915	0.877	0.899	0.89	0.638	GK, CTC=10, sigma=0.25	RA function, SD_Activity	0	0
	q-RASAR	MLR	3		111.279	0.957	0.913	0.936	0.931	0.425	GK, CTC=10, sigma=0.25	RA function, SD_Activity	0	0	MLR produced better results compared to PLS
		Model	Desc	LV	F-value	R2	Q2(LOO)	Q2F1	Q2F2	MAEtest	Setting	RASAR descriptors	Outliers (h*)	Outside AD (h*)	Inference
Global 1	QSAR	PLS	7	4	484	0.968	0.955	0.922	0.921	0.426			1 (#PE-30-S)	1 (#PE-33-S)
	q-RASAR	Univariate	1		712.07	0.914	0.908	0.957	0.956	0.316	GK, CTC=10, sigma=0.25	RA function	0	1 (#PP-31-S)	Increased F-value, increased predictivity, lower outliers
	q-RASAR	PLS	7	3	752.143	0.972	0.961	0.927	0.926	0.392	GK, CTC=10, sigma=0.25	gm*AvgSim	2 (#PE-11-S, #PE-30-S )	1 (#PE-33-S)	Increased F-value, increaed robustness, increased predictivity
	q-RASAR	MLR	7		354.381	0.976	0.966	0.927	0.926	0.405	GK, CTC=10, sigma=0.25	gm*AvgSim	2 (#PE-11-S, #PE-30-S )	1 (#PE-33-S)
Global 2	QSAR	PLS	7	5	265.767	0.952	0.94	0.901	0.84	0.373			3 (#PE-28-S, #PE-29-S, #PE-21-F)	0	Higher number of outliers
	q-RASAR	Univariate	1		475.154	0.87	0.861	0.93	0.887	0.309	GK, CTC=10, sigma=1.25	RA function	1 (#PE-31-P)	0	Highest F-value, highest predicivity, highly robust
	q-RASAR	PLS	7	6	223.043	0.953	0.943	0.901	0.839	0.369	GK, CTC=10, sigma=1.25	Cvact, Cvsim	2 (#PE-28-S, #PE-29-S)	0	Increased robustness, increased predictivity
	q-RASAR	MLR	7		188.283	0.953	0.943	0.903	0.842	0.366	GK, CTC=10, sigma=1.25	Cvact, Cvsim	2 (#PE-28-S, #PE-29-S)	0
Global 3	QSAR	PLS	6	4	360.75	0.925	0.916	0.932	0.931	0.427			2 (#PS-24-S, #PS-25-S)	2(#PP-29-S #PP-30-S)
	q-RASAR	Univariate	1		855.61	0.877	0.872	0.933	0.933	0.398	LK, CTC=8, gamma=2	RA function	5 (#PE-31-S, #PS-12-S, #PE-22-F, #PE-24-F, #PE-31-P)	1 (#PP-30-S)	Highest F-value, Highest predictivity
	q-RASAR	PLS	6	2	624.408	0.913	0.906	0.938	0.938	0.415	LK, CTC=8, gamma=2	RA function	4(#PP-32-S, #PS-20-S, #PS-24-S, #PS-25-S)	1 (#PP-29-S)
	q-RASAR	MLR	6		217.459	0.919	0.908	0.933	0.932	0.422		RA function	4 (#PP-32-S, #PS-20-S, #PS-24-S, #PS-25-S)	1 (#PP-29-S))
